# Supplementary material
Source: Research Square preprint supplement (doi:10.21203/rs.3.rs-7047182/v1)
Supplement: Supplementary file 1 [file d830d8872456ebc0316f966c.doc]

****Supplementary Material****

1. ****The CT characteristics of SSNs from the MIDI system:** including location, short/long diameter, volume, surface area, maximum surface area, quality, 3D-long diameter, d****istance from pleura, lobulation sign, spicule sign, pleural indentation sign, maximum/minimum/mean/median/standard deviation of CT value, proportion of solid component, compactness, sphericity, skewness, kurtosis, entropy, and energy.**

****①Location:** The location of nodule was divided into the upper right lobe, middle right lobe, lower right lobe, upper left lobe, and lower left lobe.**

****②Volume of SSNs:** The lung nodule was automatically segmented, then the volume of lung nodule was automatically measured by the software of InferRead CT target Reconstruction (Version 0.0.1). The volume of the SSNs Vvoxel is approximated by multiplying the number of voxels in the ROI by the volume of a single voxel Vk.
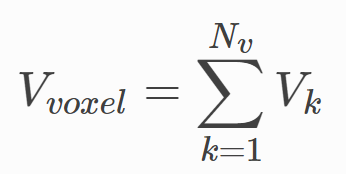
**

****③Surface area of SSNs:** To calculate the surface area, first the surface area Ai**

**of each triangle in the mesh is calculated (1). The total surface area is then obtained by taking the sum of all calculated sub-areas (2).**


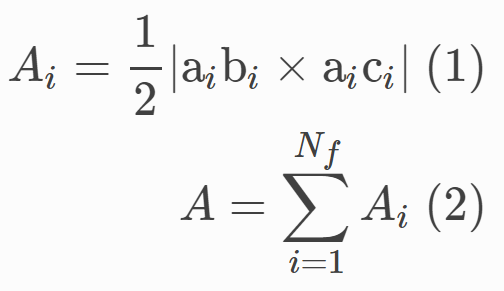


**aibi and aici are edges of the ith triangle in the mesh, formed by vertices ai, bi and ci.**

****④Maximum surface area:** the maximum of surface area of SSNs.**

****⑤Quality：** Quality is the mass of the pulmonary nodule, which can be estimated based on its volume and density. This is typically done using the formula: Quality (g) = (Nodule Average CT Value + 1000) / 10 × Nodule Volume (mm³).**

****⑥3D-long diameter:** Maximum 3D diameter is defined as the largest pairwise Euclidean distance between tumor surface mesh vertices. Also known as Feret Diameter.**

****⑦Distance from pleura:** the distance from the margin of SSNs to the pleural.**

**Proportion of solid component**

****⑧Proportion of solid component:** The proportion of solid component was quantified according to the proportion of solid component in lung nodule based on a threshold of -145 Hu.**

****⑨Compactness:**** Similar to Sphericity, Compactness is a measure of how compact the shape of the tumor is relative to a sphere (most compact). It is therefore correlated to Sphericity and redundant. It is provided here for completeness.


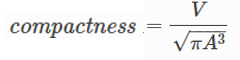


****⑩Sphericity:**** Sphericity is a measure of the roundness of the shape of the tumor region relative to a sphere. It is a dimensionless measure, independent of scale and orientation. The value range is 0<sphericity≤1, where a value of 1 indicates a perfect sphere (a sphere has the smallest possible surface area for a given volume, compared to other solids).


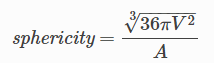


****⑪Skewness:**** Where μ3 is the 3rd central moment. Skewness measures the asymmetry of the distribution of values about the Mean value. Depending on where the tail is elongated and the mass of the distribution is concentrated, this value can be positive or negative.


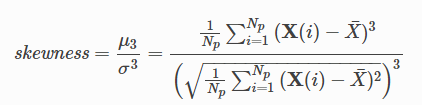


****⑫Kurtosis:**** Where μ4 is the 4th central moment. Kurtosis is a measure of the ‘peakedness’ of the distribution of values in the image ROI. A higher kurtosis implies that the mass of the distribution is concentrated towards the tail(s) rather than towards the mean. A lower kurtosis implies the reverse: that the mass of the distribution is concentrated towards a spike near the Mean value.


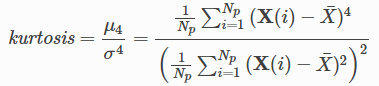


****⑬Entropy:****Here,**ϵ** is an arbitrarily small positive number (≈2.2×10−16). Entropy specifies the uncertainty/randomness in the image values. It measures the average amount of information required to encode the image values.


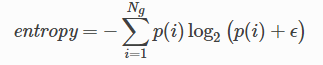


****⑭Energy：****Here, **c** is optional value, defined by voxel Array Shift, which shifts the intensities to prevent negative values in **X**. This ensures that voxels with the lowest gray values contribute the least to Energy, instead of voxels with gray level intensity closest to 0. Energy is a measure of the magnitude of voxel values in an image. A larger values implies a greater sum of the squares of these values.


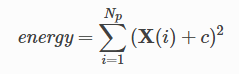


1. ****The MIDL system****

The multi-instance deep learning method (MIDL) system (InferRead CT Target Reconstruction, Version 0.0.1) can automatically detected the nodules and measure their parameters in this study. The algorithm of this system based on MIDI algorithm to establish a training set with classification labels by taking multi-example packages as training units, to establish a training set with classification labels. Based on the training unit obtained by MIDI, the backbone model adopts residual convolutional neural network (ResNet18) to extract features from K examples. Compared with traditional convolutional neural network, ResNet has great advantages in solving the problem of gradient disappearance or gradient explosion degradation caused by the network layer increasing. At the same time, the structure of ResNet can accelerate the training of neural network very quickly, and the accuracy of the model also has a better performance. The following is the structure diagram of ResNet 34-layer model:


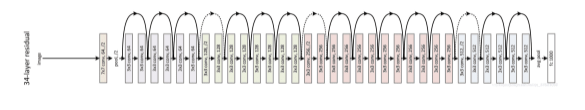


The images of each sample package were extracted by feature fusion of residual convolution neural network 2D ResNet18 and attention-based deep MIDL (attention-based deep MIDL). All features were attention-weighted, and then the variable-length sequence images were classified and analyzed. For patients with pulmonary nodules, we designed a deep learning network based on 3D ResNet to automatically segment pulmonary nodules based on the lung segmentation model obtained from the internal lung database training of Inference technology. Then, the CT value range related to the image signs of nodules was retained in the images of the lung region, which was extracted and filled into cuboids of specific size. Finally, combined with the original CT image of lung segmentation image and space cuboids within a certain HU range, the original CT image was input into the 3D ResNet network for feature extraction and analysis, and the model output four-dimensional vector results.
